# Supplementary material for: Increasing frequency and lengthening season of western disturbances is linked to increasing strength and delayed northward migration of the subtropical jet
Source: Copernicus journal article supplement (doi:10.5194/egusphere-2023-1778), 2023-08-10
Supplement: Supplementary file [file egusphere-2023-1778-AC2-supplement.pdf]

Review comments on "Increasing frequency and lengthening season of western disturbances is linked to increasing strength and delayed northward migration of the subtropical jet" by Kieran M. R. Hunt

I thank Prof Dimri for his positive evaluation of this paper. I respond to his comments below, point-by-point, in red.

"mountainous South Asia" should be "Hindukush Himalayas" ONLY. Else mountainous South Asia also includes Khasi Jantia Hills in far east and in Burma too where WDs do not reach.

I agree, I'll make this change.

Change ".....WDs can also occur during the summer monsoon with catastrophic consequence..."

To '...WDs can also occur during the summer as well interacting with monsoon leading to catastrophic 5 consequence

I will change this line to "WDs can also interact with the summer monsoon leading to catastrophic consequences"

Change "...WD season has also significantly lengthened with WDs becoming far more common in May, June and July." to "....WD season has also significantly lengthened with WDs freaking in May, June and July"

"Freaking" isn't a word, but I will adjust the sentence to reflect the unusual nature of the shift: "The WD season has also significantly lengthened with WDs becoming far more common in May, June and July; months where they were previously rare."

Pls see following as well.

Western Disturbances: A review. A. P. Dimri, D. Niyogi, A. P. Barros, J. Ridley, U. C. Mohanty, T. Yasunari, D. R. Sikka. Reviews of Geophysics Volume 53, Issue 2 p. 225-246. <https://doi.org/10.1002/2014RG000460>

Ok, I'll add this reference where relevant in the introduction.

This is exceptionally good paper and work. Kieran has proposed a new dimension on SWJ dynamics leading to determine the WDs'.

I strongly recommend this paper to accept.

Dimri
